# Supplementary material for: YUCCA2 (YUC2)-Mediated 3-Indoleacetic Acid (IAA) Biosynthesis Regulates Chloroplast RNA Editing by Relieving the Auxin Response Factor 1 (ARF1)-Dependent Inhibition of Editing Factors in Arabidopsis thaliana
Source: MDPI journal article supplement (doi:10.3390/ijms242316988), 2023-11-30
Supplement: s1 [file s1]

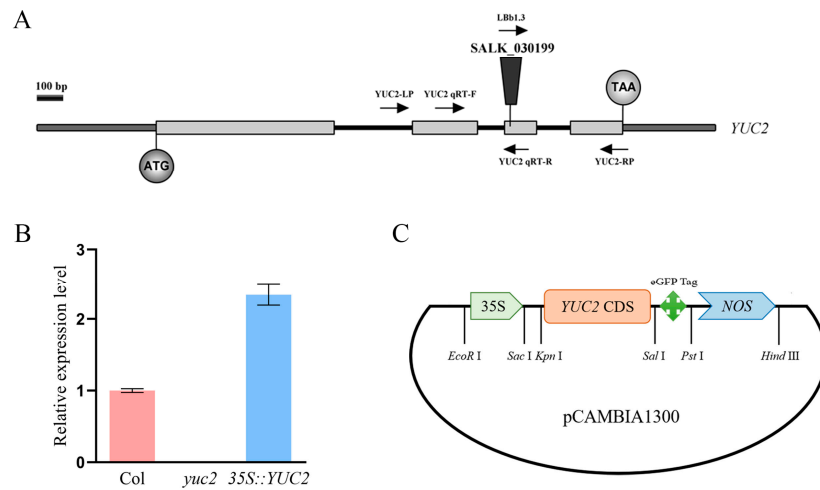

**Figure S1.** (A) The positions of the T-DNA insertions in the *YUC2* are shown. The colours from light to dark represents the CDS, UTR and intron, respectively. The arrows represent the primers used in researches. (B) The qPCR analysis of the expression of *YUC2* in Col, *yuc2* and over-expressed *YUC2*. (C) Schematic illustration of the *YUC2*-fusion construct. Expression of the *YUC2* code sequence fused with eGFP-tag is driven by the CaMV 35S promoter. Transcription is terminated by using the nopaline synthase terminator and poly(A) signal (NOS).

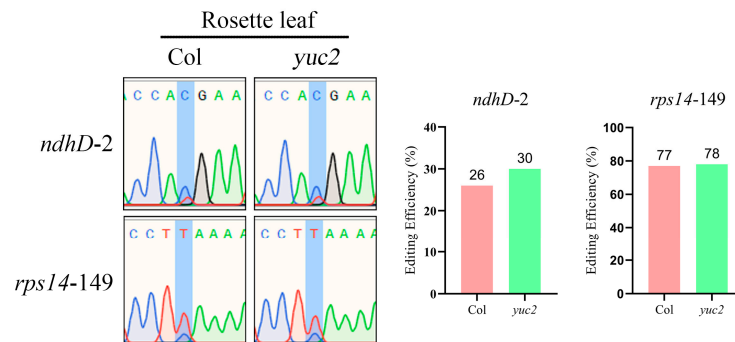

**Figure S2.** The editing efficiency of the *ndhD-2* and *rps14-149* loci in *yuc2* and Col lotus leaves. Seedlings grown in long day environment (16h light and 8h dark) at 22°C for 4 weeks.

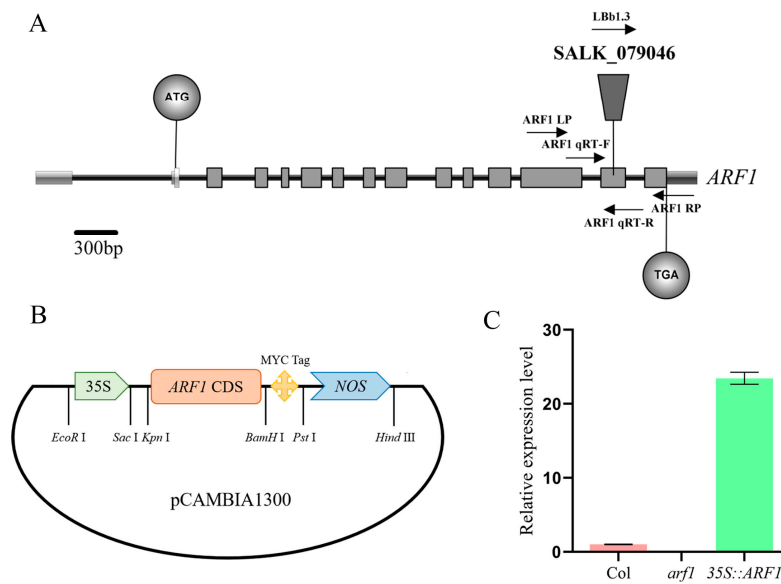

**Figure S3.** (A) The positions of the T-DNA insertions in the *ARF1* are shown. The colours from light to dark represents the CDS, UTR and intron, respectively. The arrows represent the primers used in researches. (B) Schematic illustration of the *ARF1*-fusion construct. Expression of the *ARF1* code sequence fused with 4×MYC-tag is driven by the CaMV 35S promoter. Transcription is terminated by using the nopaline synthase terminator and poly(A) signal (NOS). (C) The qPCR analysis of the expression of *ARF1* in Col, *yuc2* and over-expressed *YUC2*.

**Table S1.** List of primers used in this work

| Primer name       | Used for     | Primer sequence (5'-3')         |
|-------------------|--------------|---------------------------------|
| YUC2-LP           | Genotyping   | TTGTAGGATGTGGAAACTCCG           |
| YUC2-RP           | Genotyping   | ATAACCCAATCCAAACTTGCC           |
| ARF1-LP           | Genotyping   | CAGACACTCCTTCCTCAGTGC           |
| ARF1-RP           | Genotyping   | GCCCTCTGTATTCCCATTTC            |
| LBb1.3            | Genotyping   | ATTTTGCCGATTTCGGAAC             |
| YUC2 (Kpn I)-F    | Construction | CCGGGTACCATGGAGTTTGTACAGAAACG   |
| YUC2 (Sal I)-R    | Construction | ACGCGTCGACTTAACAATGTTGAGGACGAG  |
| ARF1 (BamH I)-F   | Construction | CGCGGATCCATGGCAGCTTCCAATCATTC   |
| ARF1 (EroR I)-R   | Construction | CCGGAATTCTCATCTTGATCCC GCCATAG  |
| CRR4pro (Kpn I)-R | Construction | CGGGGTACCCTCTTTGTCGCTCTTACAct   |
| CRR4pro (Xho I)-F | Construction | CCGCTCGAGcaggtattacgttctctgttgg |
| DYW1pro (Kpn I)-F | Construction | CGGGGTACCCCAAAGCTCCATCATCACCA   |
| DYW1pro (Xho I)-R | Construction | CCGCTCGAGccctttgttgtaatccaag    |
| ISE2pro (Kpn I)-F | Construction | CGGGGTACCGTGGACATTGTGGACAACA    |
| ISE2pro (Xho I)-R | Construction | CCGCTCGAGgttttcaggcatttcaaga    |
| CRR4 qRT-F        | qPCR         | TGCCGAGAAGAGATGTAGTTAC          |
| CRR4 qRT-R        | qPCR         | GCATTTGGTCAAACAGAGTCTT          |
| DG1 qRT-F         | qPCR         | AGGCAGAAACCGACTAAACTAA          |

|             |      |                         |
|-------------|------|-------------------------|
| DG1 qRT-R   | qPCR | CAAGCGTTAAGAATAGCGTTGT  |
| DYW1 qRT-F  | qPCR | AGGTTAGAGGAGATAAGCCAGA  |
| DYW1 qRT-R  | qPCR | CGTTCACTATGATGCATCAAGG  |
| ISE2 qRT-F  | qPCR | GATGCAGCTGTACAGTATGTTG  |
| ISE2 qRT-R  | qPCR | CACTGCATCTGGATAAAGAACG  |
| ECD1 qRT-F  | qPCR | CAGAAATAAAACGCTGCGGATA  |
| ECD1 qRT-R  | qPCR | CAATTTTCTCGCTGTGCTGATA  |
| DYW2 qRT-F  | qPCR | GTCGCTTGAGCATTCTAAGAAG  |
| DYW2 qRT-R  | qPCR | TTCCGTTATCACTATACGCACA  |
| MORF2 qRT-F | qPCR | GGTTCTTCTCAATTCGATGTGG  |
| MORF2 qRT-R | qPCR | GAGGCCGATCACTAAAGTTAGA  |
| MORF9 qRT-R | qPCR | GCGAAGAAGAACATGTATGCAT  |
| MORF9 qRT-F | qPCR | GCGAAGAAGAACATGTATGCAT  |
| MORF5 qRT F | qPCR | TCTTATATCCTCTCCCGTCGAT  |
| MORF5 qRT R | qPCR | ATCAACCAATGCTCATAATCGC  |
| ORRM6 qRT-F | qPCR | ATCTAGCTGTCTCTCTACGGAT  |
| ORRM6 qRT-R | qPCR | TCCATCACCATGTTTCATGTGTA |
| ORRM1 qRT-F | qPCR | GTCGAGATTCTTGCGAAAGTAC  |
| ORRM1 qRT-R | qPCR | CTACTCCAGGTAAACTAGCGAG  |
| CRR22 qRT-F | qPCR | AATTACACATCATGCGAAGTGG  |
| CRR22 qRT-R | qPCR | CATAATAGCACCATTTTCGCA   |
| PGN qRT-F   | qPCR | TACTCTAATCACCGGGTTTACG  |
| PGN qRT-R   | qPCR | CGTTTAATCACAGACGCATGAA  |
| RARE1 qRT-F | qPCR | GAGTTCCGGTTATAAAGAACGC  |
| RARE1 qRT-R | qPCR | GGTAAGAATACGAGCTAACGGA  |
| LPA66 qRT-F | qPCR | AAGATGATTACACCCCAAAGC   |
| LPA66 qRT-R | qPCR | CTTATCAACCCAAACGCTGTAG  |
| OCP3 qRT-F  | qPCR | TCAGGATTATCCGTCAACAGAG  |
| OCP3 qRT-R  | qPCR | CACGAGCAAAAACAAGTACAGA  |
| ECB2 qRT-F  | qPCR | TCTTCTGCTCAAAGTCCTCATT  |
| ECB2 qRT-R  | qPCR | CACAAACACATCTTCGTCTACC  |
| OTP84 qRT-F | qPCR | TTATCTCTCAATCACGCTCTCC  |
| OTP84 qRT-R | qPCR | CAAAGCAGGGAACGCATAATTA  |
| PDM1 qRT-F  | qPCR | AGATGTTTTTGTGGGAACCTCG  |
| PDM1 qRT-R  | qPCR | CACACGCTCTAAGAATGCTTAC  |
| PDM2 qRT-F  | qPCR | AGAACGAGATGCCGTATTGTAT  |
| PDM2 qRT-R  | qPCR | CATAAGTGGTTTCAGAGTCCCT  |
| ELI1 qRT-F  | qPCR | CACTTGTTTCCAAAGCCCTAAA  |
| ELI1 qRT-R  | qPCR | CTTGATTATTTCAGGCCACG    |
| PPO1 qRT-F  | qPCR | TCTGTCCAAGTCTGAAGGTG    |
| PPO1 qRT-R  | qPCR | TGTAAGCGTACCGTGACATG    |

|              |                    |                          |
|--------------|--------------------|--------------------------|
| OZ1 qRT-F    | qPCR               | GTTTGCCAAGAAACCTAAGGAG   |
| OZ1 qRT-R    | qPCR               | AGTCTGAAACATTGTGCAGTTC   |
| YUC2 qRT-F   | qPCR               | CAAGATCAAATGCGGAAAGACT   |
| YUC2 qRT-R   | qPCR               | CCGAATAATGCATTACCCGTTT   |
| ARF1 qRT-F   | qPCR               | AAGTAGACAGATACGTAGCTGC   |
| ARF1 qRT-R   | qPCR               | CTTCATCATCGGTGTAAACGAC   |
| ACTIN2 qRT-F | qPCR               | CTCCTTTGTTGCTGTTGACTAC   |
| ACTIN2 qRT-R | qPCR               | GCACAATGTTACCGTACAGATC   |
| accD-F1      | Editing efficiency | TAGTGAAAGCGGAAAGATTC     |
| accD-R1      | Editing efficiency | AATACCGTTTAGTTGACCTG     |
| accD-F2      | Editing efficiency | GCATTTGCGGGTAAAAGAGTAA   |
| accD-R2      | Editing efficiency | GAATCtgatctaacaacaggga   |
| atpF-F       | Editing efficiency | CTATGGTTCTCAAATATGATTT   |
| atpF-R       | Editing efficiency | CTAGCTTAATTCTAATAAGTCTCA |
| clpP-F       | Editing efficiency | TTTCGGATTGGCTGTCTTG      |
| clpP-R       | Editing efficiency | TATGAGGCACAAACGGGAG      |
| matK-F       | Editing efficiency | TTCCATAGAATACAATTCGCTC   |
| matK-R       | Editing efficiency | CAATTCATTCAATATTTCCCTT   |
| ndhB-F1      | Editing efficiency | GCGGAACCGATCTACTAATTC    |
| ndhB-R1      | Editing efficiency | GATCTTATACATACGCGAGG     |
| ndhB-F2      | Editing efficiency | AACTACCCGTAATAACAAAC     |
| ndhB-R2      | Editing efficiency | GGATCAACTAAGCCCTCT       |
| ndhD-F1      | Editing efficiency | GTCCAAAGAACGCGTACTCaa    |
| ndhD-R1      | Editing efficiency | CCATCTATTCCCATTCTCCAG    |
| ndhD-R2      | Editing efficiency | CCACTTTAGCGGCTTTTCCA     |
| ndhD-F2      | Editing efficiency | AACCAACCCATAGGCTCCCA     |
| ndhD-F3      | Editing efficiency | TGGGAGCCTATGGGTTGGTT     |
| ndhD-R3      | Editing efficiency | GCAATGCAAGGGAAGCCATC     |
| ndhF-F       | Editing efficiency | AGCATTCGCTGCAATAGGTCGT   |
| ndhF-R       | Editing efficiency | ATCATCCCTTTCATTCCACTTC   |
| ndhG-F:      | Editing efficiency | tcacagcaaatatgattaaaac   |
| ndhG-R       | Editing efficiency | gagaaaacagcctaataactaat  |
| petL-F       | Editing efficiency | GAGATAGTGCAGATGCCAAAGA   |
| petL-R       | Editing efficiency | GGAAAGCAAGAAGGAGGTTAGT   |
| psbE-F       | Editing efficiency | ACTTTGTTTCGTTTCGGATTT    |
| psbE-R       | Editing efficiency | CTGGGTCATTCATAGCATT      |
| psbF-F       | Editing efficiency | ACAGGAGAACGTTCTTTTGC     |
| psbF-R       | Editing efficiency | ATATAATCCATCCGAATGGG     |
| psbZ-F       | Editing efficiency | GAACTAAGTCATCTCGAATC     |
| psbZ-R       | Editing efficiency | TTCAAGTTCCATAAGTTTCGAC   |
| rpl23-F      | Editing efficiency | CTGGCATTACGACCTTTAC      |

|         |                    |                         |
|---------|--------------------|-------------------------|
| rpl23-R | Editing efficiency | CTATTGGAATTGGCTCTGT     |
| rpoA-F  | Editing efficiency | ACAGCGGGCGGTAAAATAATGT  |
| rpoA-R  | Editing efficiency | aaggctaaaagggttcaagag   |
| rpoB-F1 | Editing efficiency | TGCGTGAGGGTACTCCTAATGG  |
| rpoB-R1 | Editing efficiency | CGAAAGAATCCTCCTATGCTCC  |
| rpoB-F2 | Editing efficiency | GACCAATCCTTCCTAATTCACA  |
| rpoB-R2 | Editing efficiency | AAGAACGAGATGCTGTCTATGA  |
| rpoC1-F | Editing efficiency | TTCCCCGTAGGCCCTTCTTCTC  |
| rpoC1-R | Editing efficiency | GAGAGATAGTTGGAGAGGTGAC  |
| rps12-F | Editing efficiency | CATTTACCCTGTTAGTCCG     |
| rps12-R | Editing efficiency | AATACAAGACAGCCAATCC     |
| rps14-F | Editing efficiency | AAACATGCCTGAACCATTTCCTC |
| rps14-R | Editing efficiency | TCCGATTTGTATCATTATCATTG |
